# Supplementary material for: The role of individual nickel surface species in the hydrogen evolution reaction on nickel in alkaline electrolytes
Source: Research Square preprint supplement (doi:10.21203/rs.3.rs-7285662/v1), 2025-08-22
Supplement: Supplementary file 1 [file 9d15b0caa2cf1829b01660b0.docx]

**Supporting Information**

**The role of individual nickel surface species in the hydrogen evolution reaction on nickel in alkaline electrolytes**

*Dzevad K. Kozlica1,2,3, Matjaž Finšgar3, Pedro Farinazzo Bergamo Dias Martins1,Matej Huš1,4, Boštjan Genorio5, Justin G. Connell2,Milena Martins1,3, Matěj Hývl1,6, Taja Žibert1, Katja Andrina Varda3, Azra Osmić3, Marjan Bele1, Blaž Likozar1, Dušan Strmčnik1**

*1 National Institute of Chemistry, Ljubljana, Slovenia*

*2 Materials Science Division, Argonne National Laboratory, Argonne, IL, USA*

*3 Faculty of Chemistry and Chemical Engineering, University of Maribor, Maribor, Slovenia*

*4 Association for Technical Culture of Slovenia (ZOTKS), Ljubljana, Slovenia*

*5 Faculty of Chemistry and Chemical Technology, University of Ljubljana, Ljubljana, Slovenia*

*6 Institute of Physics of the Czech Academy of Sciences, Prague, Czech Republic*

**Table of contents:**

**Note S1. Table of values for HER activity on Ni-based catalysts from the literature 2-3**

**Note S2. Evaluation of specific activities and *IR*u correction 4-6**

**Note S3. Preparation protocols and characterization of individual Ni surfaces 7-13**

**Note S4. DFT calculations 14-15**

**Note S5. ECSA determination 16**

**Note S6. Specific Current Density Calculation 17-18**

**Note S7. Effects of surface coverage on HER 19-28**

**Supplementary references 29-37**

**Note S1. Table of values for HER activity on Ni-based catalysts from the literature**

**Table S1.** Details of the data normalization used in Fig. 1b and Fig. S1.

| **Refs. #** | **Catalyst** | ***η* [mV]**  ***@*10 mA cm−2** | ***b***  **[mV ]** | ***j*0**  **[mA cm−2]** | **ECSA**  ***C*dl = [mF cm−2]** | ***η*ECSA [mV]**  ***@*10 mA cm−2** | ***η*ECSA, *IR* corrected**  **[mV]** |
| --- | --- | --- | --- | --- | --- | --- | --- |
| 1 | 2nd-Ni/Ni(OH)2/NF-500 | 53 | 55 |  | 6.1 | 190 |  |
|  | 1st-Ni/Ni(OH)2/NF-500 | 116 | 98 |  | 3.8 | 340 |  |
|  | c-Ni/Ni(OH)2/NF-500 | 144 | 134 |  | 2.5 | 425 |  |
| 2 | 3D NiO/NF | 70 | 65 |  | 6.8 | 235 |  |
|  | NF | 243 | 189 |  | 0.9 | 555 | 277 |
| 3 | Ni/NF | 178 | 102 |  | 15.3 | 472 |  |
|  | A-Ni/NF | 187 | 107 |  | 12.2 | 485 |  |
|  | C-Ni/NF | 198 | 108 |  | 15.2 | 509 |  |
|  | AC-Ni/NF (referring to hydroxide form) | 30 | 47 |  | 20.8 | 172 |  |
| 4 | Ni/Ni(OH)2 NF | 127 | 140 |  | 71.0 | 624 | 363 |
|  | NF | 250 | 206 |  | 0.6 | 555 | 322 |
| 5 | Ni/NiO @ C-1 | 113 | 68 |  | 24 | 322 |  |
|  | Ni/NiO @ C-2 | 64 | 55 |  | 22 | 231 |  |
|  | Ni/NiO @ C-3 | 137 | 84 |  | 12 | 370 |  |
|  | Ni/NiO @ C-2_acid treatment | 219 | 199 |  | 47 | 830 | 313 |
|  | Ni/NiO @ C-2_oxidation | 264 | 249 |  | 18 | 999 | 373 |
| 6 | Ni/Ni(OH)2/NiOOH | 45 | 100 |  | 0.94 | 230 |  |
|  | Ni(OH)2/NiOOH | 421 | 167 |  | 0.06 | 501 |  |
| 7 | Ni/NiO-0s | 87 | 119 |  | 325 | 587 | 468 |
|  | Ni/NiO-3s | 25 | 74 |  | 665 | 261 |  |
|  | Ni/NiO-10s | 47 | 89 |  | 380 | 428 |  |
|  | Ni/NiO-3000s | 63 | 93 |  | 139 | 420 |  |
|  | Ni/NiO-15000s | 115 | 127 |  | 65 | 461 | 430 |
| 8 | Ni(OH)2/NF @ 40 V | 157 | 82 |  | 2.9 | 334 |  |
|  | Ni(OH)2/NF @ 25 V | 207 | 94 |  | 1.73 | 389 |  |
|  | Ni(OH)2/NF @ 10 V | 210 | 99 |  | 1.84 | 404 |  |
|  | Ni(OH)2/NF @ 5 V | 214 | 100 |  | 1.58 | 404 |  |
|  | Ni(OH)2/NF @ 1 V | 218 | 120 |  | 1.37 | 438 |  |
|  | NF | 296 | 130 |  | 2.2 | 561 | 460 |
| 9 | NiOx/NF | 70 | 68 |  | 17.8 | 271 |  |
|  | NiOx/NF-C1 | 135 | 159 |  | 14.5 | 590 | 269 |
| 10 | Ni/β-Ni(OH)2 NSAs | 58 | 78 |  | 168.5 | 364 |  |
|  | Ni/α-Ni(OH)2 NSAs | 127 | 101 |  | 83.9 | 493 |  |
| 11 | Ni(111) |  | 115 | 0.0022 | *A*geo = 0.063 cm−2 | 421 |  |
|  | Ni(100) |  | 107 | 0.00092 | *A*geo = 0.09 cm−2 | 432 |  |
|  | Ni(110) |  | 117 | 0.0011 | *A*geo = 0.087 cm−2 | 463 |  |
| 12 | Ni/NiO (NF-120) | 160 | 68 |  | 0.4 | 249 |  |
|  | NF-60 | 195 | 77 |  | 0.21 | 274 |  |
|  | NF-90 | 176 | 73 |  | 0.31 | 263 |  |
|  | NF | 288 | 155 |  | 0.125 | 412 |  |
| 13 | Ni/Ni(OH)2 (HZ 1.5) | 168 | 96 |  | 1.99 | 360 |  |
|  | HZ 0.0 | 527 | 71 |  | 1.61 | 662 |  |
|  | HZ 0.5 | 390 | 110 |  | 1.80 | 605 |  |
|  | HZ 1.0 | 345 | 102 |  | 1.81 | 545 |  |
|  | HZ 2.0 | 278 | 103 |  | 1.25 | 463 |  |
|  | HZ 2.5 | 242 | 110 |  | 0.45 | 391 |  |
| 14 | Ni/NiO-250 | 145 | 43 |  | 3.3 | 240 |  |
|  | NiO NSs | 251 | 60 |  | 0.9 | 350 |  |
| 15 | Ni | 330  (*@5* mA cm−2) | 135 |  | Roughness factor (*R*f) = 1.9 | 408 |  |
| 16 | NF | 261 | 94 |  | 1.1 | 425 |  |
| 17 | Ni(poly) | 310  (*@5* mA cm−2) | 144 |  | RF = 1 | 353 |  |
|  | Ni/Ni(OH)2 | 235  (*@5* mA cm−2) | 128 |  | RF = 1 | 273 |  |
| 18 | Ni/Ni | 221 | 123 |  | 8.3 | 543 |  |
| 19 | Ni/NiO-0.7 | 401 | 105 |  | 111 | 794 | 639 |
|  | Ni/NiO-2.7 | 220 | 101 |  | 115 | 600 | 412 |
|  | Ni/NiO-3.8 | 90 | 41 |  | 127 | 292 |  |
|  | Ni/NiO-6.1 | 150 | 72 |  | 124 | 423 |  |
| 20 | NiO/Ni-240 | 259 | 120 |  | 108 | 707 |  |
|  | NiO/Ni-270 | 234 | 111 |  | 109 | 649 |  |
|  | NiO/Ni-300 | 194 | 123 |  | 108 | 653 |  |
|  | NiO/Ni-350 | 219 | 113 |  | 109 | 641 |  |
|  | Ni | 247 | 110 |  | 108 | 657 |  |
| 21 | β-Ni(OH)2 | 333 | 230 |  | 0.1 | 494 | 351 |
| 22 | Polished Ni rod |  | 115 | 0.0042 | RF = 2.1 | 351 |  |
|  | Chemically etched Ni rod |  | 125 | 0.0047 | RF = 3.0 | 356 |  |
| 23 | NiO @ NF-6 | 310 | 231 |  | 1.77 | 760 | 471 |
| 24 | Ni | 86 | 68 |  | 7.52 | 261 |  |
|  | alpha-Ni(OH)2 | 333 | 127 |  | 2.04 | 588 | 438 |
|  | beta-Ni(OH)2 | 549 | 450 |  | 1.95 | 1444 | 551 |
| 25 | Ni (nanosheets) | 354 | 145 |  | 0.066 | 429 | 408 |
|  | NiO (nanosheets) | 372 | 165 |  | 0.062 | 621 | 453 |
|  | Ni/NiO (nanosheets) | 226 | 135 |  | 0.12 | 422 | 330 |
| 26 | Ni(OH)2 @Ni/CC | 68 | 97 |  | 2.42 | 270 |  |
|  | Ni(OH)2/CC | 262 | 185 |  | 5.25 | 710 | 542 |
|  | Ni/CC | 104 | 184 |  | 3.98 | 527 | 340 |
| 27 | Ni @ C-400/Ni foam | 110 | 95 |  | 1.38 | 527 |  |
| 28 | as-depisited 50 nm Ni | 263 | 89 |  | RF = 1.004 | 263 |  |
|  | oxidized 50 nm Ni ("hydroxide") | 220 | 92 |  | RF = 1.006 | 220 |  |
|  | as-depisited 300 nm Ni | 256 | 92 |  | RF = 1.004 | 256 |  |
|  | oxidized 300 nm Ni | 215 | 108 |  | RF = 1.011 | 215 |  |
| 29 | Flame-like Ni(OH)2/NF | 56 | 53 |  | 62.3 | 241 |  |
| 30 | H-Ni/C | 167 | 106 |  | 2.75 | 394 |  |
|  | H-Ni/NiO/C | 87 | 92 |  | 4.89 | 307 |  |
|  | H-NiO/C | 246 | 124 |  | 1.08 | 461 |  |
| 31 | β-Ni(OH)2/NF | 145 | 51 |  | 30.5 | 307 |  |
| 32 | Ni(OH)2@Ni/CP | 106 | 88 |  | 5.6 | 321 |  |

**Note S2. Evaluation of specific activities and *IR* correction**

**(S1)**

In Equation S1, where ***I*** is the current, ***n*** is the number of electrons, ***F*** is the Faraday constant, ***A*** is the electrochemically active surface area ECSA (geometric surface area, *A*geo multiplied by the roughness factor, *R*f), ***k*0** is a unit constant, ***α*** is the transfer coefficient, ***R*** is the gas constant, ***T*** is the temperature, is the water reactant activity at the electrode surface, is the standard free energy of water activated complex, ***E*** is the potential applied to the electrode, ***R*u** is the uncompensated resistance, ***r*** is a constant describing the rate of change of with ***(***, which is the percentage of the electrode surface that is covered by adsorbed species and is dependent on the free energy of adsorption of these adsorbates and on the applied potential.

The evaluation of ECSA is not always straightforward. For Ni surfaces, most common approaches include integration of the charge under the anodic peak at ~0.4 V and evaluation of the double layer capacitance (*C*dl), either by electrochemical impedance spectroscopy or from current vs. scan rate plot4,24,26.

However, we note that the *C*dl approach does not include the term, as it represents the average value of the entire surface in contact with the electrolyte. As such, the *C*dl gives only an estimation of true ECSA and therefore the normalization process described below does not yield true specific activities (*j*spec.). The situation is further complicated for supported catalysts, where *C*dl measurement includes the contributions of the support as well.

Accordingly, for the literature data summarized in Table S1, which served as the basis for Fig. 1a, the active surface is most often reported using the *C*dl approach; therefore, we used the reported *C*dl values from the individual studies for normalization. As a result, the dashed lines in Fig. 1, representing our data, were derived without including the term in the normalization.

The normalization procedure applied to literature data is described below. First, ECSA was calculated using Equations S2 and S3.

**(S2)**

**(S3)**

A specific capacitance (*C*s) value of 20 µF cm−2 was assumed for bare Ni electrode, as commonly reported in the literature33–35.

Next, the normalized activity (*j*ECSA), i.e., the geometric current (*I*geo) normalized by ECSA, was calculated using Equation S4.

**(S4)**

The hydrogen evolution reaction (HER) activity is most often reported in the literature as overpotential (*η*geo) required to achieve geometric current density of −10 mA cm−2geo. Accordingly, to obtain the ECSA-normalized overpotential values (*η*ECSA)shown in Fig. 1b, Fig. S1 and Table S1, we used a normalized current density of −10 mA cm−2ECSA.

**Fig. S1 |** **Summary of scattered experimental HER activity data for Ni-based catalysts reported in the literature. a**, activities plotted as overpotential (*η*geo) at geometric current density (*j*geo) of −10 mA cm−2. **b**, activities normalized to ECSA. **c**, activities normalized to the ECSA and corrected for ohmic overpotential (*IR*u drop) to the best of our ability. The blue arrow illustrates the overall spread in activity, while the orange arrow indicates the general shift in activity upon normalization. Symbols represent literature-reported values for three types of Ni surfaces: metallic Ni0 (black), NiO/Ni (red), and Ni(OH)2/Ni (green). Multiple data points from individual studies reflect different NiOxHy/Nicompositions studied within the same work (see References S1-32). Black, red, and green dashed horizontal lines indicate the HER activity values measured in this study: black corresponds to pure metallic Ni, red to the least active NiO/Ni interface, and green to the most active Ni(OH)2/Ni interface.

After normalization, the majority of data points shift to significantly lower activities (i.e., higher overpotentials), as shown in Fig. S1b. Strikingly, nearly all of the previously reported highest activities now fall below the intrinsic activity of pure metallic Ni, as measured in this study (black dashed line, Fig. 1). This suggests that the apparent ‘extraordinary’ activities largely arise from the high surface area of the catalyst rather than their intrinsic performance. Despite normalization, a considerable spread in the data persists. To address this, we further corrected data points where the *ohmic* overpotential **)** was clearly undercompensated or not compensated at all, which resulted in a reduction of the *true kinetic* overpotential (see details in the Table S1). This correction noticeably reduced the overall data scatter, as illustrated in Fig. 1c.

The Ohmic drop (*IR*) correction was performed by manually extending the linear portion of the lower current range in the reported Tafel plots. Finally, *η*ECSA at −10 mA cm−2 was recalculated from the extracted *low-current* *η* values using the Tafel equation (Equation S5), yielding *η*ECSA,*IR* – the overpotential corrected for uncompensated resistance, as shown in Table S1.

**(S5)**

Here, *b* represents the Tafel slope, and *a* is related to the exchange current density (*j*0).

The remaining data spread in Fig. S1c is attributed to the immense complexity of Ni surface chemistry, where species such as metallic Ni, NiHx, NiO, α-Ni(OH)2, β-Ni(OH)2, and NiOOH may exist individually or coexist in various combinations.

Together, these data suggest that the HER activity values reported in the literature are often inflated – not only due to poor experimental design and careless handling and analysis of raw data (human error), but also due to a lack of fundamental understanding of the relationship between inherent Ni surface species and HER kinetics in alkaline electrolytes. As will be shown below, this knowledge gap can affect the observed activity by as much as three to four orders of magnitude.

**Note S3. Preparation protocols and characterization of individual Ni surfaces**

Anyone who has worked with Ni in alkaline electrolytes is familiar with the notorious irreproducibility of its surface, a consequence of the difficulty in stabilizing its surface state. The complexity of Ni surface chemistry, marked by the coexistence of multiple intrinsic species, casts doubt even on seemingly reproducible results.

To establish a meaningful correlation between HER activity and specific Ni species, exact control over the surface composition was essential. To this end, we developed a set of protocols to prepare surfaces dominated by one of the following well-defined Ni states:

1. Bare metallic Ni (unmodified surface)

2. Ni partially modified, predominantly with Hx

3. Ni partially modified, predominantly with Ni(OH)2

4. Ni partially modified, predominantly with NiO

These are denoted as **Ni0**, **Ni(H)**, **Ni(OH)**, and **Ni(O)**,respectively.

To prepare the **Ni0** surface, we employed two distinct approaches. The first involves surface preparation under ultra-high vacuum (UHV) via Ar+ ion sputtering, followed by a brief annealing step at 600 °C. As shown in the scanning electron microscopy (SEM) image (Fig. S2), the annealing produced extended surfaces with large, 10–200 µm-sized grains. Within individual grains, the surface was close to atomically flat, as seen in the atomic force microscopy (AFM) image and the corresponding profile line scan in Fig. 2a. The X-ray photoelectron spectroscopy (XPS) spectrum confirmed that our preparation procedure yielded a surface free of oxygenated species, as indicated by a single prominent Ni 2p3/2 peak at 852.5 eV, characteristic of metallic Ni (Fig. 2h), and the absence of any significant signal in the O 1s region (Fig. S3a,b).

**Fig. S2 |** **SEM images of the annealed polycrystalline Ni surface.** **a**, Annealing produced an extended surface with large grains ranging from 10 to 200 µm. **b**, Close-up view of selected grain boundaries, showing a surface that appears flat within the resolution of the SEM.

**Fig. S3 | XPS spectra of different Ni surfaces. a**, Survey XPS spectrum for **Ni0**. **b**-**d**, Peak deconvolution of high-resolution (HR) XPS O 1s spectra for **Ni0**, **Ni(OH)**, **Ni(O**), respectively.

The sample was then transferred from the UHV chamber, under vacuum, to a transfer vessel and subsequently moved to a N2-filled glovebox. Electrochemical characterization was performed by recording a cyclic voltammogram from 0.00 V to 0.55 V and back to –0.15 V vs. reversible hydrogen electrode (RHE), revealing oxidation and reduction peaks associated with the formation and reduction of Ni(OH)2,respectively, as described in Equation S6 (Fig. 2d).

**(S6)**

**(S7)**

Alternatively, the **Ni0** surface can be obtained by inductive heating at 1000 °C in a H2/Ar atmosphere, followed by transfer through air with a protective droplet of water to shield the surface from airborne contaminants. The air-formed (hydr)oxide layer is then electrochemically reduced at −0.40 V vs. RHE. To complete the preparation, the subsurface hydride formed during this process is removed by holding the potential at 0.30 V for 20 min – a sufficiently positive value to oxidize unwanted hydride while keeping the co-formed hydroxide within reducible monolayer coverage, thereby minimizing the formation of irreducible Ni(OH)2. Notably, this step, followed by a potential sweep past −0.15 V, is essential for obtaining a clean, metallic **Ni0** surface (dashed pink, Fig. S4). Integration of the charge under the cathodic peak associated with Ni(OH)2 reduction (Equation S6) yields charge density of 355 µC cm−2, which closely matches the theoretical value of 367 µC cm−2 corresponding to one monolayer (1 ML) of Ni(OH)2. This estimate assumes a layered hexagonal structure in which each Ni(II) layer is sandwiched between two OH− layers, with a surface density of 1.14 × 1015 ions cm−2, as suggested by Seyeux et al.36. Afterward, the scan direction was reversed toward the anodic side, up to 0.55 V, to characterize the Ni0 surface.

The reproducibility of the Ni0 surface prepared by two independent methods was confirmed by the close agreement of their anodic peak features, as shown in Fig. S4. However, the differences in the cathodic region were expected, as the two methods involve different starting potentials and the initial direction of the scan.

**Fig. S4 | Preparation of Ni0 surface via two methods.** In the first, Ni0 was prepared under UHV by Ar+ ion sputtering and annealing at 600 °C, then transferred under vacuum to a N2-filled glovebox. A voltammogram recorded from 0 V to 0.55 V and reverse to –0.15 vs. RHE, showed characteristic Ni(OH)2 oxidation and reduction peaks (dashed black curve). Alternatively, Ni0 was obtained by inductive heating at 1000 °C in a H2/Ar atmosphere, followed by air transfer using a protective water droplet. The air-formed (hydr)oxide was reduced at −0.4 V, subsurface hydride removed by holding at 0.30 V for 20 min, followed first by a cathodic sweep to −0.15 V and then anodic sweep to 0.55 V (dashed pink curve). The overlapping anodic peaks indicate that both methods reproducibly yield Ni0 surfaces.

**Ni(H)** was prepared by by holding the potential of the **Ni0** electrode between −0.05 and −0.40 V vs. RHE. As NiHx cannot be probed by the XPS, we relied on CV to determine the exact amount present in/on Ni (Fig. S13). Comparison of the anodic peaks at 0.40 V, where Ni(OH)2 forms on **Ni0**(blue dashed line in Fig. 2e, obtained after stripping of hydride from the Ni surface), as described in Equation S6, and coupled formation of Ni(OH)2 and oxidation of NiHx on **Ni(H)**, as described in Equations S6 and S7, suggests that 0.52 ML of hydride was formed by holding the electrode at −0.40 V.

To probe the location of the H, we performed a CO displacement experiment (Fig. S5)37. Were H adsorbed (Had) on the Ni surface, displacement by CO molecules would induce an anodic transient current. However, no such transient was observed. Instead, a continuously decreasing cathodic current was recorded, consistent with progressive CO adsorption and eventual complete surface blocking. This strongly suggests that hydrogen resides beneath the surface rather than on it.

One might perhaps point to a faint transient signal of opposite polarity. This signal was observed during the physical switch of the gas lines from Ar to CO purging and is attributed to trace amounts of oxygen that entered the system. The minor cathodic transient is therefore explained as an experimental artifact, arising from residual oxygen reduction (ORR).

**Fig. S5 | CO displacement experiment on a Ni surface modified with Hx.** The Ni electrode was first polarized at −0.40 V vs. RHE to make subsurface hydride, then the potential was changed to −0.15 V before introducing CO. The electrolyte was initially purged with Ar, which was then replaced by CO at the time indicated by the dashed black arrow on the graph. The dark yellow band highlights the region where CO progressively blocks the surface. No current associated with Had desorption was observed, confirming that hydrogen (i.e., “hydride”) resides beneath the Ni surface.

As noted earlier, exposing the Ni surface to potentials above 0.30 V induces irreversible changes, forming a Ni(OH)2-modified surface **Ni(OH)**. For example, extending the positive potential limit to 0.55 V results in an anodic peak corresponding to the formation of 1.4 ML of Ni(OH)2, indicating partial coverage with multilayer hydroxide. This behavior is in good agreement with earlier work by Šimpraga and Conway38, which showed that even at low levels of Ni surface oxidation, hydroxide growth follows Volmer-Weber (VW)-type behavior39, with 3D islands forming already at lower coverages, and no uniform monolayer developing. More importantly, this hydroxide is not fully reduced during the cathodic sweep, resulting in a slightly lower cathodic charge compared to the anodic one. Consequently, each successive scan shows diminishing voltammetric peaks (Fig. S6).

Fig. 2f displays the 30th scan, where metallic Ni availability is significantly reduced (~30%) relative to **Ni0**. HR XPS Ni 2p3/2 spectra (Fig. 2i) confirm surface composition dominated by metallic Ni and Ni(OH)2, indicated by peaks at 852.5 eV and 855.9 eV, respectively. O 1s spectra (Fig. S3c) further support this, with a dominant hydroxide peak at 531.1 eV.

**Fig. S6 | Irreversibility of Ni(OH)2 species on Ni surface.** Thirty potential cycles were performed on thr Ni0 surface. A gradual decrease in the voltametric peak intensity was observed with each cycle, reflecting the progressive accumulation of irreducible Ni(OH)2 species.

Finally, the **Ni(O)** model surface was chemically prepared by thermal oxidation of the **Ni0** surface at 300 °C in a stream of Ar/O2 gas. The HR XPS Ni 2p3/2 spectrum of **Ni(O)** displays an intense metallic Ni peak at 852.5 eV and a distinct fingerprint double-headed peak at 854.0 eV and 855.7 eV, attributed to Ni(II) from oxide species (Fig. 2j).

We note that special care should be taken when drawing conclusions from the XPS data. Three prevalent examples of crude misinterpretation of double-headed feature in the literature24,25,27,40–42 are highlighted: (i) assigning the main peak to metallic Ni and the shoulder to a hydroxide or oxide; (ii) attributing the main peak to the oxide and the shoulder to the hydroxide; and (iii) distortion in the relative intensities of the double-headed feature, where a dominant shoulder makes it incorrect to attribute the entire signal to oxide alone, as it includes significant hydroxide contribution. To avoid potential confusion and guide the reader through the article, Fig. S7 provides clear insight into the peak shapes corresponding to specific Ni (hydr)oxide species.

The XPS O 1s spectrum of **Ni(O)** also shows an intense peak at 529.3 eV, characteristic of oxide species (Fig. S3d). Fitting parameters for both Ni 2p3/2 and O 1s spectra of **Ni(OH)** and **Ni(O)** are listed in Tables S2 and S3, following the methodology established by Biesinger and co-workers43.

**Fig. S7 |** **The XPS spectra exhibit distinct fingerprints for Ni(II) in oxide and hydroxide species. a,** a double-headed peak with a maximum at 854.0 eV and a shoulder at 855.7 eV, characteristic of Ni(II) in oxide species. **b,** a single peak with a maximum at 855.9 eV, consistent with Ni(II) in hydroxide species. **c,** a double-headed peak with a maximum at more positive binding energy (BE) and a shoulder at lower BE, opposite to the pattern observed for oxide, indicating the prevalence of hydroxide with a significant contribution from oxide species.

**Table S2.** Fitting parameters for HR XPS Ni 2p3/2 spectra corresponding to Fig. 2h-j adapted from Biesinger et al.43. FWHM denotes the full width at half maximum.

| Component | A | B | C | D | E | F | G |
| --- | --- | --- | --- | --- | --- | --- | --- |
| Name | **metallic Ni1** | **metallic Ni2** | **metallic Ni3** | **Ni(OH)21** | **Ni(OH)22** | **Ni(OH)23** | **Ni(OH)24** |
| Peak position | 852.5 | 856.4 | 858.8 | 854.9 | 856.0 | 858.0 | 860.8 |
| Area constraints | A | A × 0.08 | A × 0.15 | E × 0.16 | E | E × 0.07 | E × 0.03 |
| FWHM | 1.03 | 2.30 | 2.30 | 1.36 | 2.50 | 1.40 | 1.26 |
|  |  |  |  |  |  |  |  |
| Component | H | I | J | K | L | M | N |
| Name | **Ni(OH)25** | **Ni(OH)26** | **NiO1** | **NiO2** | **NIO3** | **NiO4** | **NiO5** |
| Peak position | 861.5 | 866.8 | 854.0 | 855.7 | 861.1 | 864.1 | 866.7 |
| Area constraints | E × 0.86 | E × 0.08 | K × 0.32 | K | K × 0.77 | K × 0.08 | K × 0.09 |
| FWHM | 4.85 | 3.20 | 1.00 | 3.25 | 3.76 | 2.04 | 2.44 |

We note that the (hydr)oxide peak positions are slightly shifted to higher binding energies than expected, likely due to differential charging effects44. This shift results from the insulating nature of the (hydr)oxide layers relative to the underlying conductive metallic Ni substrate—a well-known, yet often overlooked phenomenon in the surface chemistry literature.

**Table S3.** Fitting parameters for HR XPS O 1s spectra corresponding to Fig. S3 adapted from Biesinger et al.43.

| Component | A | B | C |
| --- | --- | --- | --- |
| Name | **Oxide** | **Hydroxide** | **Water/Organic** |
| Peak position | 529.2 | 531.1 | 532.9 |
| FWHM | 0.95 | 1.59 | B × 1 |

**Note S4. ECSA determination**

**Fig. S8 | Cyclic voltammograms illustrating determination of surface coverages ().** **a**,The hatched area labeled “A” represents the charge associated with the oxidation of Ni to Ni(OH)2 and serves as the basis for ECSA determination. **b**,**c**, The correction term, labeled “B”, increases with hydroxide coverage – being negligible at 0% and progressively larger at higher coverage levels (e.g., 30%, 60%).

The *true* ECSA of **Ni(OH)** and **Ni(O)**was determined by cyclic voltammetry (CV). Here, we show the procedure using **Ni(OH)** as an example. Quantitatively, the ECSA is given by the product of ***A*** and **(1 − ad)**, as described by Equation S8:

**= *A* (1 − ad) (S8)**

where ***A*** is the real surface area (*A*geo multiplied by the *R*f), and **ad** is the surface coverage by adsorbed species. AFM measurements confirm that our electrodes are atomically flat (*R*f = 1), so ***A***equals the *A*geo.

Ni(OH)2 surface coverage (and, by extension, the ECSA) was determined by integrating the charge under the anodic peak at 0.40 V (Fig. S8a), which corresponds to the oxidation of Ni to Ni(OH)2 and defines the fingerprint voltammogram for Ni0 (= 0%). The irreducible Ni(OH)2 deposition on the Ni surface reduces this anodic peak charge (Fig. S8b,c).Comparing these integrated charges at 0.40 V provides a quantitative estimate of the Ni(OH)2 surface coverage (Equation S9).

**(S9)**

where is the charge density associated with the oxidation of Ni to Ni(OH)2 on a surface partialy covered by irreducible Ni(OH)2​, and is the charge density corresponding to the oxidation of Ni to Ni(OH)2 on an unmodified (bare) Ni surface.

We note that, to ensure a fair comparison across all investigated surfaces and their respective coverages, the contribution from the pre-anodic hump, observed at potentials more negative than 0 V vs. RHE and more prominent at higher hydroxide coverages, was excluded from the analysis. This feature, labeled as B (Fig. S8b,c), has been attributed in the literature to hydride or hydrogen oxidation (HOR) as a result of prior HER activity45,46. However, understanding the relationship between hydroxide coverage and the onset or extent of parasitic processes contributing to this pre-anodic feature is not essential for elucidating the role of Ni species in HER kinetics on Ni. Therefore, a detailed discussion of this phenomenon lies beyond the scope of the present work.

**Note S5. Specific current density calculation**

In the present work, we highlighted the lack of a standardized protocol for reporting HER activity in the literature. Reported activities, expressed as current densities (*j*), vary widely and include ECSA-normalized (*j*ECSA, mA/cm2), geometric (*j*geo, mA/cm2) or mass-normalized (*j*mass, mg/cm2) values. To enable meaningful comparisons across different studies and avoid artificial „inflation“ of performance metrics, we strongly recommend reporting the true *specific* current densities (*j*spec), obtained by normalizing the measured activity to the measured charge density, thereby accounting for both the *R*f and the **1 − ad** term, as defined in Equation S10.

**(S10)**

where is the measured activity (geometric current density), ***q*measured** is the measured charge density, and ***q*monolayer** is the charge density of 516 µC cm−2, corresponding to the formation of one monolayer of Ni(OH)2 on the Ni(poly) surface, as reported in the literature33,47–49. Fig. S9 presents bar graphs showing the values of kinetic parameters used to evaluate the HER activity of **Ni0**, **Ni(H)**, **Ni(OH)**, and **Ni(O)** surfaces.

**Fig. S9 | Kinetic metrics for evaluating the HER activity of different Ni species.** **a**, geometric current densities (*j*geo) at −0.30 V. **b**, specific current densities (*j*spec) at −0.30 V. **c**, geometric overpotentials (*η*geo) at −10 mA cm−2, and **d**,1 − ad**-**normalized overpotentials (*η*spec) at −10 mA cm−2. Bar graphs are derived from the polarization curves in Fig. 3a.

**Note S6. DFT calculations**

To computationally evaluate the effects of the surface type and co-adsorbed species, H*, OH*, and O* were co-adsorbed on an undecorated Ni(111) surface, as depicted in Fig. 3b and Figs. S10 and S11. The feasibility of HER and the properties of different surfaces were studied using several proxy or surrogate quantities. Among them, the dissociation barrier, , for the reaction H2O* + *→ OH* + H* is most indicative of the reaction kinetics. Furthermore, we computed the adsorption energy of H* and OH* as a function of coverage, Bader charges, and work function.

*Adsorption.* DFT calculations show that H* readily adsorbs. The adsorption energy of H* (relative to ½ H2(g)) monotonically changes from –0.50 eV to –0.54 eV as the surface coverage increases from 0.00 to 1.00 ML. Surface H* is highly mobile with a surface diffusion barrier of 0.51 eV. Furthermore, H* can easily penetrate the subsurface, where the adsorption energies range from +0.10 eV to –0.02 eV. This shows that every subsequent H atom penetrates more easily. While these considerations are thermodynamic, kinetics also support them. The barrier for hydrogen migration to the subsurface decreases from 0.75 eV at 0.06 ML to 0.70 eV at 1.00 ML.

*Reaction barriers.* We have calculated the reaction energy (), adsorption energy of a water molecule (, and activation barrier for H2O dissociation () on Ni(111) with different co-adsorbed species, as shown in Table S4. The co-adsorbed species/moieties that were considered included adsorbed O on Ni (O@Ni(111), Fig. S10 b), NiO cluster on Ni ((NiO)6@Ni(111), Fig. S10a), adsorbed OH on Ni (OH@Ni(111), Fig. S11a), Ni(OH)2 cluster on Ni ((Ni(OH)2)6@Ni(111), Fig. S11b), Ni(OH)2 full layer on Ni (Fig. S12a), Ni adatom on Ni(OH)2 layer on Ni (Fig. S12b). For H modified Ni, we considered subsurface H (Hsub@Ni(111)), surface H (Hsurf@Ni(111)) and both speies together (Hsub+Hsurf@Ni(111)). We assumed that during HER at high overpotentials, the surface is considerably covered by Hsurf and that the changes we observe are due to the additional effect of subsurface hydrogen, amounting to 0.04 eV, reported in the main text.

**Table S4.** DFT calculated energetics of water dissociation (H2O → OH + H). All values are reported in eV.

| Model | **Adsorption energy,** | **Activation energy,** | **Reaction energy,** |
| --- | --- | --- | --- |
| Ni(111) | –0.43 | 1.02 | +0.07 |
| Hsub@Ni(111) | –0.46 | 1.02 | +0.09 |
| Hsurf@Ni(111) | -0.34 | 1.14 | +0.41 |
| Hsub+Hsurf@Ni(111) | –0.34 | 1.18 | +0.79 |
| OH@Ni(111) | –0.37 | 0.96 | –0.01 |
| O@Ni(111) | –0.43 | 1.03 | +0.06 |
| (Ni(OH)2)6@Ni(111) | –0.65 | 0.89 | +0.08 |
| (NiO)6@Ni(111) | –0.53 | 1.04 | +0.15 |
| Ni(OH)2 film on Ni(111) | –0.47 | 1.64 | +1.09 |

**Fig. S10 | Structures of transition states for H2O dissociation on atomistic models, representing active sites for Ni(O). a**, atthe (NiO)6@Ni(111)@Ni(111) interface and **b**, onO@Ni(111). Green, red, and white spheres represent Ni, O, and H atoms, respectively. The red frame highlights the dissociating water molecule, while the blue frame indicates the modified Ni surface.

**Fig. S11 | Structures of transition states for H2O dissociation on atomistic models, representing active sites for Ni(OH). a**,onOH@Ni(111) and **b**, at the(Ni(OH)2)6@Ni(111)@Ni(111) interface. Green, red, and white spheres represent Ni, O, and H atoms, respectively. The red frame highlights the dissociating water molecule, while the blue frame indicates the modified Ni surface.

**Fig. S12 | Structures of transition states for H2O dissociation on atomistic models, representing active sites for Ni(OH) involving film structure a**,directly on the Ni(OH)2 film, and **b**,onNi metal atoms located on the Ni(OH)2 film. Green, red, and white spheres represent Ni, O, and H atoms, respectively. The red frame highlights the dissociating water molecule.

**Note S7. Effects of surface coverage on HER**

NiHx

**Fig. S13 | The role of NiHx in HER on Ni in alkaline electrolytes.** **a**, HER polarization curves for NiHx-modifed surfaces. All curves were corrected for *IR*u drop. **b**, Cyclic voltammograms for different NiHxconcentrations. **c**, Bar graph showing HER *activity* (i.e., *j*geo) as current density at −0.30 V. **d**, Bar graph showing overpotentials required to reach −10 mA cm−2.

CV was employed to quantify the amount of NHx species present in/on Ni (Fig. S13b). Different NiHx concentrations () were achieved by carefully controlling the electrode surface, as NiHx is unstable upon potential shifts from the conditions under which it forms. Note that concentrations are used instead of coverage, as we showed in the main text that H resides beneath the Ni surface. The potential was held at various potentials more negative than 0 V vs. RHE for 2 min to define the NiHx concentration, followed by a CV scan from the respective hold potential to 0.55 V. To obtain subsurface H concentrations of 4%, 29%, and 52%, the electrode potential was held at −0.05 V, −0.20 V, and −0.40 V vs. RHE, respectively.

Comparison between the anodic peaks at 0.40 V in the cyclic voltammograms of **Ni0** (solid black line, Equation S6) and **Ni(H)** (dashed blue line, Equations S6 and S7) reveals an additional charge attributable to the oxidation of subsurface H. Assuming 1 H atom per Ni surface atom (1 ML coverage), the theoretical charge density for the oxidation of an entire monolayer of H on Ni(poly) surface is typically taken as 258 µC cm−2 (half of 516 µC cm−2), reflecting vs. processes for subsurface H and Ni oxidation, respectively. Accordingly, the H surface coverage can be determined by dividing the measured extra charge by 258 µC cm−2.

Fig. S13a demonstrates that increasing the subsurface H concentration results in a monotonic decrease in HER activity. The extent of the current density reduction at −0.30 V cannot be reasonably attributed to a decrease in the number of available Ni sites (where = 1), as would be expected from a classical poisoning effect (Fig. S13c,d). Since H species reside in the subsurface region, as shown above by CO displacement experiments (Fig. S5) and later supported by DFT calculations (Table S4), the observed decline in HER rate is attributed entirely to changes in the activation barrier for water dissociation ().

NiO

**Fig. S14 | HR XPS spectra for varying NiO surface coverages. a**,Ni 2p3/2 spectra: The peak intensity at 852.5 eV indicative of metallic Ni (gray band) decreases with increasing NiO coverage, while the broad double-headed peak (red band) attributed to Ni(II) species, i.e. NiO, becomes more prominent. XPS was not used to quantify ΘNiO, (which was determined via CV), but rather to qualitatively confirm that NiO coverage can be tuned by thermal synthesis. **b**, O 1s spectra: The peak at 529.3 eV indicative of metal oxide increases with the increase in NiO coverage, accompanied by a concomitant decrease in the hydroxide-related signal. (with ad = 1–7) indicates a gradual increase in surface coverage from 0–98%.

Fig. S14a indirectly demonstrates a high degree of surface control that can be achieved by carefully tuning the annealing conditions, such as temperature and duration, in an Ar/O2 gas mixture. This approach enabled the preparation of a wide range of NiO coverages, characterized by an increasing fingerprint intensity of NiO accompanied by a simultaneous decrease in the signal corresponding to the metallic Ni species.

Purists among us may notice that, for example, at NiO coverage 2, the surface exhibits minor hydroxide contamination. Such contamination is expected to some degree across all NiO coverages (see hydroxide signal in Fig. S14b), but becomes increasingly difficult to discern at first glance in the HR XPS Ni 2p3/2 spectra as oxide coverage increases. This is attributed to the *ex-situ* nature of XPS characterization, which requires transferring the sample from the electrochemical cell to the XPS chamber. However, we emphasize that this hydroxide contribution is absent during electrochemical measurements, given the extreme susceptibility of the HER to the presence of Ni(OH)2, which would otherwise accelerate the reaction. Fortunately, no such enhancement was observed; instead, a clear blocking effect was evident, as reflected in the HER activity trend shown in Fig. 4b,c. Nevertheless, it is important to keep in mind that the primary purpose of the *ex-situ* XPS characterization was to demonstrate that we can control the surface coverage to be dominated by a specific species, in this case, NiO.

**Fig. S15 | Time-of-flight secondary ion mass spectrometry (ToF-SIMS) negative ion depth profiles for the** **Ni(O) surface.** The intensity of 60NiO**−** fragmentincreaseswith NiO surface coverage as a function of sputter time(upper panel).This is accompanied by the emergence of 60Ni3**−** fragment representing metallic Ni (lower panel), indicating subsurface composition changes.

Fig. S15 shows the depth profiles that underpin the 3D visualizations presented in Fig. 4c. In the top panel, the increasing intensity and delayed onset (i.e., shift toward longer sputtering times) of the NiO⁻ signal indicate more abundant oxide formation, manifested as both increased surface coverage (2D growth) and slight thickening of the oxide layer (few-layer 3D growth). Notably, since ToF-SIMS is susceptible to near-surface features, the observed 3D component likely corresponds to sub-nanometer to nanometer-scale oxide structures only a few nanometers thick, rather than bulk-like films. Meanwhile, in the bottom panel (Fig. S15), the Ni3⁻ signal (metallic Ni) appears later for samples with higher NiO⁻ intensity, indicating modest increases in oxide coverage. The overlapping region between the Ni⁻ and NiO⁻ signals reflects a gradual and laterally heterogeneous Ni/NiO interface, consistent with thin, surface-confined NiO domains rather than a sharp or layered boundary.

The ToF-SIMS and XPS are complementary surface characterization techniques. ToF-SIMS is uniquely suited for determining submonolayer surface species, which makes it essential to correlate specific Ni species with HER activity in this study. It offers high surface sensitivity to trace components and high depth resolution, which is ideal for analyzing ultra-thin surface layers. In contrast, XPS is more effective for identifying elemental composition and oxidation states.

**Fig. S16 | Quantification of the effects of different NiO coverages.** **a**,Cyclic voltammograms for all investigated coverages, including the previously ommited data points from Fig. 4a. **b**, HER polarization curves for all investigated coverages, including the data points missing from Fig. 4b. All curves were corrected for *IR*u drop.

We challenge the prevailing view that interfacial NiO promotes HER kinetics. To contextualize our findings, we reference a body of literature2,5,7,9,12,14,16,19,20,23,25,27,28,30,40–42,50–82 that supports this claim. However, our results clearly show that the reaction rate scales directly with the number of accessible Ni active sites (i.e., coverage), indicating that NiO behaves merely as a spectator species (Fig. S16).

Ni(OH)2

**Fig. 17 |** **Quantification of the effects of different Ni(OH)2 coverages.** **a**, Cyclic voltammograms for all investigated coverages, including previously ommited data points from Fig. 5a. **b**, HER activity for all coverages, including previously missing data points from Fig. 5b. All curves were corrected for *IR*u drop. **c**, Simplified *volcano plot* corresponding to the selected data points from Fig. 5c.

In the following discussion, we demonstrate that another type of oxygenated species, interfacial Ni(OH)2, plays a promotive role.

In Fig. S17, we argue that the observed volcano-shaped trend in HER activity (Fig. S17c) cannot be explained solely by the Ni(OH)2 surface coverages (ΘNi(OH)2) derived from cyclic voltammograms (Fig. 5a and Fig. S17a). The system is more complex when we consider how different ΘNi(OH)2 values were obtained and consider the actual composition and structure of the surface film.

At low surface coverages (0-28%), HER activity increases monotonically. These surfaces were prepared by cycling the potential between −0.15 and 0.55 V, as described in the *Experimental section*. XPS spectra (Fig. S18) show that the surface is composed mainly of Ni(OH)2 and metallic Ni. After 30 cycles, corresponding to 28% surface coverage, the highest HER activity is observed. Further cycling within this same potential window does not improve activity; in fact, it begins to decrease. Moreover, increasing the coverage beyond 45% proved experimentally unfeasible using this approach.

To achieve higher Ni(OH)2 coverages, protocols involving more positive anodic limits (up to 1.10 V) were used, while avoiding the oxidation of Ni(OH)2 to NiOOH. Interestingly, beyond ~25% surface coverage, XPS and ToF-SIMS spectra reveal the emergence of NiO alongside Ni(OH)2, with NiO becoming the dominant species at coverages exceeding 60%.

ToF-SIMS 3D depth profiling shows that NiO resides beneath the Ni(OH)2, directly contacting the metallic Ni (Fig. 5d and Fig. S19). This structural arrangement prevents Ni(OH)2 from interacting with the metal surface, effectively deactivating the active HER site. Since NiO acts purely as a blocking layer, the overall activity increasingly resembles that of NiO-modified surfaces as coverage increases, despite the continued thickening of the Ni(OH)2 layer.

Taken together, these results demonstrate that under well-controlled experimental conditions, HER activity at lower Ni(OH)2 coverage (Θ < 28%) is governed primarily by the . However, once the coverage exceeds ~28%, the activity becomes dominated by largely due to the presence of underlying NiO.

**Fig. S18 |** **HR XPS spectra for varying Ni(OH)2 surface coverages. a**, Ni 2p3/2 spectra: The intensity of the peak indicative of metallic Ni at 852.5 eV (gray band) decreases with increasing Ni(OH)2 coverage, while the prominent peak indicative of Ni(OH)2 (green band) becomes more prominent. We emphasize that at higher surface coverages, the contribution of NiO species becomes significant (red dashed lines). **b**, O 1s spectra: The peak indicative of hydroxide at 531.1 eV increases with the number of potential cycles at the upper anodic limit (*E*ul) of −0.40 V. Notably, this hydroxide signal remains stable as the *E*ul increases from −0.40 V to 0.135 V, while the peak representing metal oxide grows, consistent with the trend observed in Ni 2p3/2 spectra. (with ad = 1–7) indicates a gradual increase in surface coverage 0–97%.

Fig. S18 presents the XPS spectra for a surface predominantly covered with hydroxide species. The BE of the **Ni(OH)**surface shifts slightly to more positive values with increasing Ni(OH)2 surface coverage. This trend reflects enhanced surface passivation at more positive upper potential limits (*E*ul), leading to *differential charging* of the deposits83. The Ni(OH)2 passivation layer forms simultaneously with NiO underlayer, sandwiched between Ni(OH)2 and metallic Ni. If isolated passive phases (Ni(OH)2, NiO) form without intimate contact with the metallic surface, a higher BE feature would be expected. This behavior is consistent with our ToF-SIMS measurements (Fig. 5c), where 3D images and depth profiles reveal the formation of a progressively thicker (hydr)oxide passive bilayer with increasing surface coverage, in agreement with the findings of Streblow et al84. This effect is not as pronounced on the **Ni(O)** surface due to the careful control of surface conditions during annealing in an Ar/O2 atmosphere (Fig. S14). To achieve the same Ni(OH)2 coverage as on NiO, rigorous cycling to more positive potentials is required, where the (hydr)oxide layer thickens, leading to a differential charging effect.

**Fig. S19 | ToF-SIMS negative ion depth profiles for the** **Ni(OH) surface.** The intensity of NiO2H**−** fragmentincreaseswith Ni(OH)2 surface coverage as a function of sputter time(top panel). The intensity of NiO**−** fragment follows a similar trend (middle panel) but appears with a delay relative to NiO2H**−**. This is followed by the emergence of the intensity of Ni3**−** fragment (bottom panel). Together, these signals suggest a bilayer (hydr)oxide structure, with NiO in contact with metallic Ni and Ni(OH)2 forming the topmost layer.

Fig. S19 shows the depth profiles that underpin the 3D visualizations presented in Fig. 5c. In the top panel, the NiO2H⁻ signal, attributed to Ni(OH)2, intensifies and shifts to longer sputtering times, indicating increased surface coverage and more abundant hydroxide layer. The middle panel shows that for each surface coverage, the NiO⁻ signal emerges after the NiO2H⁻ signal, confirming the moderate thickening of the NiO layer beneath the hydroxide layer. Finally, in the bottom panel, the Ni3⁻ signal (metallic Ni) emerges at longer sputtering times, especially for higher (hydr)oxide coverage samples, demonstrating it lies beneath both layers. The consistent rightward shift of all three signals with increasing coverage supports a layered architecture, in which Ni(OH)2 forms on top of an intermediate NiO layer, which in turn rests on the underlying metallic Ni substrate.

**Supplementary references (S1-84)**

1. Liu, Y. *et al.* Papillae-like morphology of Ni/Ni(OH)2 hybrid crystals by stepwise electrodeposition for synergistically improved HER. *CrystEngComm* **21**, 3431–3438 (2019).

2. He, B., Kuang, Y., Hou, Z., Zhou, M. & Chen, X. Enhanced electrocatalytic hydrogen evolution activity of nickel foam by low-temperature-oxidation. *Journal of Materials Research* **33**, 213–224 (2018).

3. Lai, W. *et al.* In situ Raman spectroscopic study towards the growth and excellent HER catalysis of Ni/Ni(OH)2 heterostructure. *International Journal of Hydrogen Energy* **46**, 26861–26872 (2021).

4. Rao, Y., Wang, Y., Ning, H., Li, P. & Wu, M. Hydrotalcite-like Ni(OH)2 Nanosheets in Situ Grown on Nickel Foam for Overall Water Splitting. *ACS Appl. Mater. Interfaces* **8**, 33601–33607 (2016).

5. Jiang, H. *et al.* Ternary interfacial superstructure enabling extraordinary hydrogen evolution electrocatalysis. *Materials Today* **21**, 602–610 (2018).

6. Rathore, D., Sharma, M. D., Sharma, A., Basu, M. & Pande, S. Aggregates of Ni/Ni(OH)2/NiOOH Nanoworms on Carbon Cloth for Electrocatalytic Hydrogen Evolution. *Langmuir* **36**, 14019–14030 (2020).

7. Peng, L. *et al.* Nanoporous Ni/NiO catalyst for efficient hydrogen evolution reaction prepared by partial electro-oxidation after dealloying. *Journal of Alloys and Compounds* **911**, 165061 (2022).

8. Saraj, C. S. *et al.* Single-Step and Sustainable Fabrication of Ni(OH)2/Ni Foam Water Splitting Catalysts via Electric Field Assisted Pulsed Laser Ablation in Liquid. *ChemElectroChem* **8**, 209–217 (2021).

9. Jiang, J. *et al.* Amorphous nickel oxide electrodes with high-current-density electrocatalytic performance for hydrogen evolution. *International Journal of Hydrogen Energy* **51**, 887–894 (2024).

10. Shao, D., Wang, Q., Yao, X., Zhou, Y. & Yu, X.-Y. Phase-engineering of nickel hydroxide in the Ni/Ni(OH)2 interface for efficient hydrogen evolution and hydrazine-assisted water splitting in seawater. *J. Mater. Chem. A* **10**, 21848–21855 (2022).

11. Varvaris, K. L., Esau, D., Schuett, F. M., Jacob, T. & Jerkiewicz, G. Surface Structure Dependence of Electrochemical Processes at Monocrystalline Nickel Electrodes. Part 1: The Hydrogen Evolution Reaction. *J. Phys. Chem. C* **127**, 14711–14722 (2023).

12. Li, C. *et al.* Acid promoted Ni/NiO monolithic electrode for overall water splitting in alkaline medium. *Sci. China Mater.* **60**, 918–928 (2017).

13. Lim, D. *et al.* Strongly Coupled Ni/Ni(OH)2 Hybrid Nanocomposites as Highly Active Bifunctional Electrocatalysts for Overall Water Splitting. *ACS Sustainable Chem. Eng.* **8**, 4431–4439 (2020).

14. Yan, X., Tian, L. & Chen, X. Crystalline/amorphous Ni/NiO core/shell nanosheets as highly active electrocatalysts for hydrogen evolution reaction. *Journal of Power Sources* **300**, 336–343 (2015).

15. Sheng, W., Myint, M., Chen, J. G. & Yan, Y. Correlating the hydrogen evolution reaction activity in alkaline electrolytes with the hydrogen binding energy on monometallic surfaces. *Energy Environ. Sci.* **6**, 1509–1512 (2013).

16. Kou, T. *et al.* Carbon doping switching on the hydrogen adsorption activity of NiO for hydrogen evolution reaction. *Nat Commun* **11**, 590 (2020).

17. Danilovic, N. *et al.* Enhancing the Alkaline Hydrogen Evolution Reaction Activity through the Bifunctionality of Ni(OH)2/Metal Catalysts. *Angewandte Chemie* **124**, 12663–12666 (2012).

18. Wang, P., Wan, L., Lin, Y. & Wang, B. NiFe Hydroxide Supported on Hierarchically Porous Nickel Mesh as a High-Performance Bifunctional Electrocatalyst for Water Splitting at Large Current Density. *ChemSusChem* **12**, 4038–4045 (2019).

19. Zhao, L. *et al.* Steering elementary steps towards efficient alkaline hydrogen evolution via size-dependent Ni/NiO nanoscale heterosurfaces. *National Science Review* **7**, 27–36 (2020).

20. Peng, L. *et al.* Chimney effect of the interface in metal oxide/metal composite catalysts on the hydrogen evolution reaction. *Applied Catalysis B: Environmental* **245**, 122–129 (2019).

21. Balčiūnaitė, A. *et al.* Steps towards highly-efficient water splitting and oxygen reduction using nanostructured β-Ni(OH)2. *RSC Adv.* **12**, 10020–10028 (2022).

22. Grdeń, M. & Jerkiewicz, G. Influence of Surface Treatment on the Kinetics of the Hydrogen Evolution Reaction on Bulk and Porous Nickel Materials. *Electrocatalysis* **10**, 173–183 (2019).

23. Zheng, J. *et al.* Homologous NiO//Ni2P nanoarrays grown on nickel foams: a well matched electrode pair with high stability in overall water splitting. *Nanoscale* **9**, 4409–4418 (2017).

24. Xue, S., Liang, Y., Hou, S., Zhang, Y. & Jiang, H. Alpha-Nickel Hydroxide Coating of Metallic Nickel for Enhanced Alkaline Hydrogen Evolution. *ChemSusChem* **15**, e202201072 (2022).

25. Faid, A. Y., Barnett, A. O., Seland, F. & Sunde, S. Ni/NiO nanosheets for alkaline hydrogen evolution reaction: In situ electrochemical-Raman study. *Electrochimica Acta* **361**, 137040 (2020).

26. Xing, Z., Gan, L., Wang, J. & Yang, X. Experimental and theoretical insights into sustained water splitting with an electrodeposited nanoporous nickel hydroxide@nickel film as an electrocatalyst. *J. Mater. Chem. A* **5**, 7744–7748 (2017).

27. Xi, W. *et al.* Dual-valence nickel nanosheets covered with thin carbon as bifunctional electrocatalysts for full water splitting. *J. Mater. Chem. A* **4**, 7297–7304 (2016).

28. Neumüller, D. *et al.* Hydrogen Evolution Reaction on Ultra-Smooth Sputtered Nanocrystalline Ni Thin Films in Alkaline Media—From Intrinsic Activity to the Effects of Surface Oxidation. *Nanomaterials* **13**, 2085 (2023).

29. Zhou, Y. *et al.* Flame-like Ni(OH)2 strongly promotes the dissociation of water and can be used to produce an excellent hybrid electrocatalyst for the hydrogen evolution reaction in alkaline media. *Electrochemistry Communications* **91**, 66–70 (2018).

30. Do, H. H. *et al.* Hollow Ni/NiO/C composite derived from metal-organic frameworks as a high-efficiency electrocatalyst for the hydrogen evolution reaction. *Nano Convergence* **10**, 6 (2023).

31. Yang, J.-H. *et al.* Morphology-controllable nanocrystal β-Ni(OH)2/NF designed by hydrothermal etching method as high-efficiency electrocatalyst for overall water splitting. *Journal of Electroanalytical Chemistry* **882**, 115035 (2021).

32. Lu, S. *et al.* Electrodeposited porous spherical Ni(OH)2@Ni on carbon paper for high-efficiency hydrogen evolution. *International Journal of Hydrogen Energy* **46**, 1540–1547 (2021).

33. Machado, S. A. S. & Avaca, L. A. The hydrogen evolution reaction on nickel surfaces stabilized by H-absorption. *Electrochimica Acta* **39**, 1385–1391 (1994).

34. Lasia, A. & Rami, A. Kinetics of hydrogen evolution on nickel electrodes. *Journal of Electroanalytical Chemistry and Interfacial Electrochemistry* **294**, 123–141 (1990).

35. Trasatti, S. & Petrii, O. A. Real surface area measurements in electrochemistry. *Pure and Applied Chemistry* **63**, 711–734 (1991).

36. Seyeux, A., Maurice, V., Klein, L. H. & Marcus, P. In situ scanning tunnelling microscopic study of the initial stages of growth and of the structure of the passive film on Ni(111) in 1 mM NaOH(aq). *J Solid State Electrochem* **9**, 337–346 (2005).

37. Conway, B. E., MacDougall, B. & Kozlowska, H. A. Anodic displacement of adsorbed H in electrochemisorption of organic molecules at platinum. *J. Chem. Soc., Faraday Trans. 1* **68**, 1566–1582 (1972).

38. S̄impraga, R. & Conway, B. E. Realization of monolayer levels of surface oxidation of nickel by anodization at low temperatures. *Journal of Electroanalytical Chemistry and Interfacial Electrochemistry* **280**, 341–357 (1990).

39. Campbell, C. T. Bimetallic Surface Chemistry. *Annu. Rev. Phys. Chem.* **41**, 775–837 (1990).

40. Gong, M. *et al.* Nanoscale nickel oxide/nickel heterostructures for active hydrogen evolution electrocatalysis. *Nat Commun* **5**, 4695 (2014).

41. Li, X. *et al.* Sequential Electrodeposition of Bifunctional Catalytically Active Structures in MoO3/Ni–NiO Composite Electrocatalysts for Selective Hydrogen and Oxygen Evolution. *Advanced Materials* **32**, 2003414 (2020).

42. Lu, K. *et al.* LixNiO/Ni Heterostructure with Strong Basic Lattice Oxygen Enables Electrocatalytic Hydrogen Evolution with Pt-like Activity. *J. Am. Chem. Soc.* **142**, 12613–12619 (2020).

43. Biesinger, M. C., Payne, B. P., Lau, L. W. M., Gerson, A. & Smart, R. St. C. X-ray photoelectron spectroscopic chemical state quantification of mixed nickel metal, oxide and hydroxide systems. *Surface and Interface Analysis* **41**, 324–332 (2009).

44. Maibach, J., Lindgren, F., Eriksson, H., Edström, K. & Hahlin, M. Electric Potential Gradient at the Buried Interface between Lithium-Ion Battery Electrodes and the SEI Observed Using Photoelectron Spectroscopy. *J. Phys. Chem. Lett.* **7**, 1775–1780 (2016).

45. Pshenichnikov, A. G. Electrocatalytic properties of nickel and nickel-based alloys. *Materials Chemistry and Physics* **22**, 121–148 (1989).

46. Floner, D., Lamy, C. & Leger, J.-M. Electrocatalytic oxidation of hydrogen on polycrystal and single-crystal nickel electrodes. *Surface Science* **234**, 87–97 (1990).

47. Obradović, M. D. & Gojković, S. Lj. Challenges in determining the electrochemically active surface area of Ni-oxides in the oxygen evolution reaction. *Journal of Electroanalytical Chemistry* **918**, 116479 (2022).

48. Alsabet, M., Grden, M. & Jerkiewicz, G. Electrochemical Growth of Surface Oxides on Nickel. Part 1: Formation of α-Ni(OH)2 in Relation to the Polarization Potential, Polarization Time, and Temperature. *Electrocatal* **2**, 317–330 (2011).

49. Beden, B., Floner, D., Léger, J. M. & Lamy, C. A voltammetric study of the formation on hydroxides and oxyhydroxides on nickel single crystal electrodes in contact with an alkaline solution. *Surface Science* **162**, 822–829 (1985).

50. Jo, S. *et al.* High-Performance Nickel–Bismuth Oxide Electrocatalysts Applicable to Both the HER and OER in Alkaline Water Electrolysis. *ACS Appl. Mater. Interfaces* **17**, 11946–11955 (2025).

51. Koshy, S. S., Rath, J. & Kiani, A. Laser fabricated binder-free Ni/NiO nanostructured electrodes for enhanced hydrogen evolution. *International Journal of Electrochemical Science* **20**, 101004 (2025).

52. Mondal, A., Paul, A., Srivastava, D. N. & Panda, A. B. NiO hollow microspheres as efficient bifunctional electrocatalysts for Overall Water-Splitting. *International Journal of Hydrogen Energy* **43**, 21665–21674 (2018).

53. Kong, Q. *et al.* Hydrothermal Synthesis of Nanoporous NiO Rods Self-Supported on Ni Foam as Efficient Electrocatalysts for Hydrogen Evolution Reaction. *JOM* **71**, 621–625 (2019).

54. Kenney, M. J. *et al.* An electrodeposition approach to metal/metal oxide heterostructures for active hydrogen evolution catalysts in near-neutral electrolytes. *Nano Res.* **12**, 1431–1435 (2019).

55. Dong, Y., Dang, J., Wang, W., Yin, S. & Wang, Y. First-Principles Determination of Active Sites of Ni Metal-Based Electrocatalysts for Hydrogen Evolution Reaction. *ACS Appl. Mater. Interfaces* **10**, 39624–39630 (2018).

56. Kamal, K. M. *et al.* Precise design and construction of NiO-Ni heterostructures for active hydrogen evolution photocatalysis. *Applied Catalysis O: Open* **194**, 206997 (2024).

57. Xie, K. *et al.* Ni/NiO hybrid nanostructure supported on biomass carbon for visible-light photocatalytic hydrogen evolution. *J Mater Sci* **56**, 12775–12788 (2021).

58. Han, H., Park, S., Jang, D. & Kim, W. B. N-doped carbon nanoweb-supported Ni/NiO heterostructure as hybrid catalysts for hydrogen evolution reaction in an alkaline phase. *Journal of Alloys and Compounds* **853**, 157338 (2021).

59. Wang, J. *et al.* Reaction-driven transformation of Ni/NiO hybrid structure into Ni single atoms. *Materials Today Energy* **17**, 100436 (2020).

60. Yan, Y., Ma, Q., Cui, F., Zhang, J. & Cui, T. Carbon onions coated Ni/NiO nanoparticles as catalysts for alkaline hydrogen evolution reaction. *Electrochimica Acta* **430**, 141090 (2022).

61. Huang, J. *et al.* Boosting Hydrogen Transfer during Volmer Reaction at Oxides/Metal Nanocomposites for Efficient Alkaline Hydrogen Evolution. *ACS Energy Lett.* **4**, 3002–3010 (2019).

62. Chen, F. *et al.* Ultrastable and highly efficient hydrogen evolution by heterogeneous NiO/Ni catalysts under industrial electrolysis conditions. *Inorg. Chem. Front.* **11**, 425–435 (2024).

63. Navarro-Pardo, F. *et al.* Nickel oxide/nickel nanohybrids for oxygen and hydrogen evolution in alkaline media. *Electrochimica Acta* **506**, 145002 (2024).

64. Li, C. *et al.* Accelerating water dissociation at carbon supported nanoscale Ni/NiO heterojunction electrocatalysts for high-efficiency alkaline hydrogen evolution. *Nano Res.* **16**, 4742–4750 (2023).

65. Poimenidis, I. A., Lykaki, M., Moustaizis, S., Loukakos, P. & Konsolakis, M. One-step solvothermal growth of NiO nanoparticles on nickel foam as a highly efficient electrocatalyst for hydrogen evolution reaction. *Materials Chemistry and Physics* **305**, 128007 (2023).

66. Zhang, T. *et al.* Engineering oxygen vacancy on NiO nanorod arrays for alkaline hydrogen evolution. *Nano Energy* **43**, 103–109 (2018).

67. Liu, Y. *et al.* Nickel/Nickel Oxide-Nitrogen Self-Doped Carbon Nanosheets for Electrocatalytic Oxygen and Hydrogen Evolution Reactions. *ACS Appl. Nano Mater.* **5**, 2953–2961 (2022).

68. Oshchepkov, A. G., Bonnefont, A. & Savinova, E. R. On the Influence of the Extent of Oxidation on the Kinetics of the Hydrogen Electrode Reactions on Polycrystalline Nickel. *Electrocatalysis* **11**, 133–142 (2020).

69. Xu, Y.-F., Gao, M.-R., Zheng, Y.-R., Jiang, J. & Yu, S.-H. Nickel/Nickel(II) Oxide Nanoparticles Anchored onto Cobalt(IV) Diselenide Nanobelts for the Electrochemical Production of Hydrogen. *Angewandte Chemie* **125**, 8708–8712 (2013).

70. Foster, M. E., Kendrick, I., Mukerjee, S. & Jones, R. Role of Graphene on Ni/NiO for the Hydrogen Evolution Reaction. *J. Phys. Chem. C* **126**, 16158–16163 (2022).

71. Chen, H. *et al.* In situ surface reconstruction synthesis of a nickel oxide/nickel heterostructural film for efficient hydrogen evolution reaction. *Chem. Commun.* **56**, 10529–10532 (2020).

72. Bates, M. K., Jia, Q., Ramaswamy, N., Allen, R. J. & Mukerjee, S. Composite Ni/NiO-Cr2O3 Catalyst for Alkaline Hydrogen Evolution Reaction. *J. Phys. Chem. C* **119**, 5467–5477 (2015).

73. Thiruvengadam, D., Nithiasri, R., Davidrichetson, A., Santhosh Kumar, K. & Jayabharathi, J. Unleashing Potential of BNiO-300 as a Superior Electrocatalyst for Overall Water Splitting. *Energy Fuels* **39**, 2799–2811 (2025).

74. Oshchepkov, A. G. *et al.* Exploring the Influence of the Nickel Oxide Species on the Kinetics of Hydrogen Electrode Reactions in Alkaline Media. *Top Catal* **59**, 1319–1331 (2016).

75. Liu, X., Wang, X., Yuan, X., Dong, W. & Huang, F. Rational composition and structural design of in situ grown nickel-based electrocatalysts for efficient water electrolysis. *J. Mater. Chem. A* **4**, 167–172 (2015).

76. Zhou, F. & Tao, G. Structure Sensitivity in Hydrogen Adsorption on Ni/NiO Interfaces for the Hydrogen Evolution Reaction. *J. Phys. Chem. C* **127**, 23180–23188 (2023).

77. Wang, J. *et al.* Dominating Role of Ni0 on the Interface of Ni/NiO for Enhanced Hydrogen Evolution Reaction. *ACS Appl. Mater. Interfaces* **9**, 7139–7147 (2017).

78. Wang, L.-L. *et al.* Tailoring Lewis Acidity of Metal Oxides on Nickel to Boost Electrocatalytic Hydrogen Evolution in Neutral Electrolyte. *J. Am. Chem. Soc.* **147**, 7555–7563 (2025).

79. Gong, M. *et al.* Blending Cr2O3 into a NiO–Ni Electrocatalyst for Sustained Water Splitting. *Angewandte Chemie International Edition* **54**, 11989–11993 (2015).

80. Zhang, Z., Liu, S., Xiao, F. & Wang, S. Facile Synthesis of Heterostructured Nickel/Nickel Oxide Wrapped Carbon Fiber: Flexible Bifunctional Gas-Evolving Electrode for Highly Efficient Overall Water Splitting. *ACS Sustainable Chem. Eng.* **5**, 529–536 (2017).

81. Lovell, E. C., Lu, X., Zhang, Q., Scott, J. & Amal, R. From passivation to activation – tunable nickel/nickel oxide for hydrogen evolution electrocatalysis. *Chem. Commun.* **56**, 1709–1712 (2020).

82. Zhang, G., Li, G. & Wang, X. Surface Modification of Carbon Nitride Polymers by Core–Shell Nickel/Nickel Oxide Cocatalysts for Hydrogen Evolution Photocatalysis. *ChemCatChem* **7**, 2864–2870 (2015).

83. Connell, J. G. *et al.* Tuning the Reversibility of Mg Anodes via Controlled Surface Passivation by H2O/Cl– in Organic Electrolytes. *Chem. Mater.* **28**, 8268–8277 (2016).

84. Hoppe, H.-W. & Strehblow, H.-H. XPS and UPS examinations of the formation of passive layers on Ni in 1 M sodium hydroxide and 0.5 M sulphuric acid. *Surface and Interface Analysis* **14**, 121–131 (1989).
